# Supplementary material
Source: MDPI journal article supplement (https://www.mdpi.com/2076-3263/13/9/283)
Supplement: s1 [file s1]

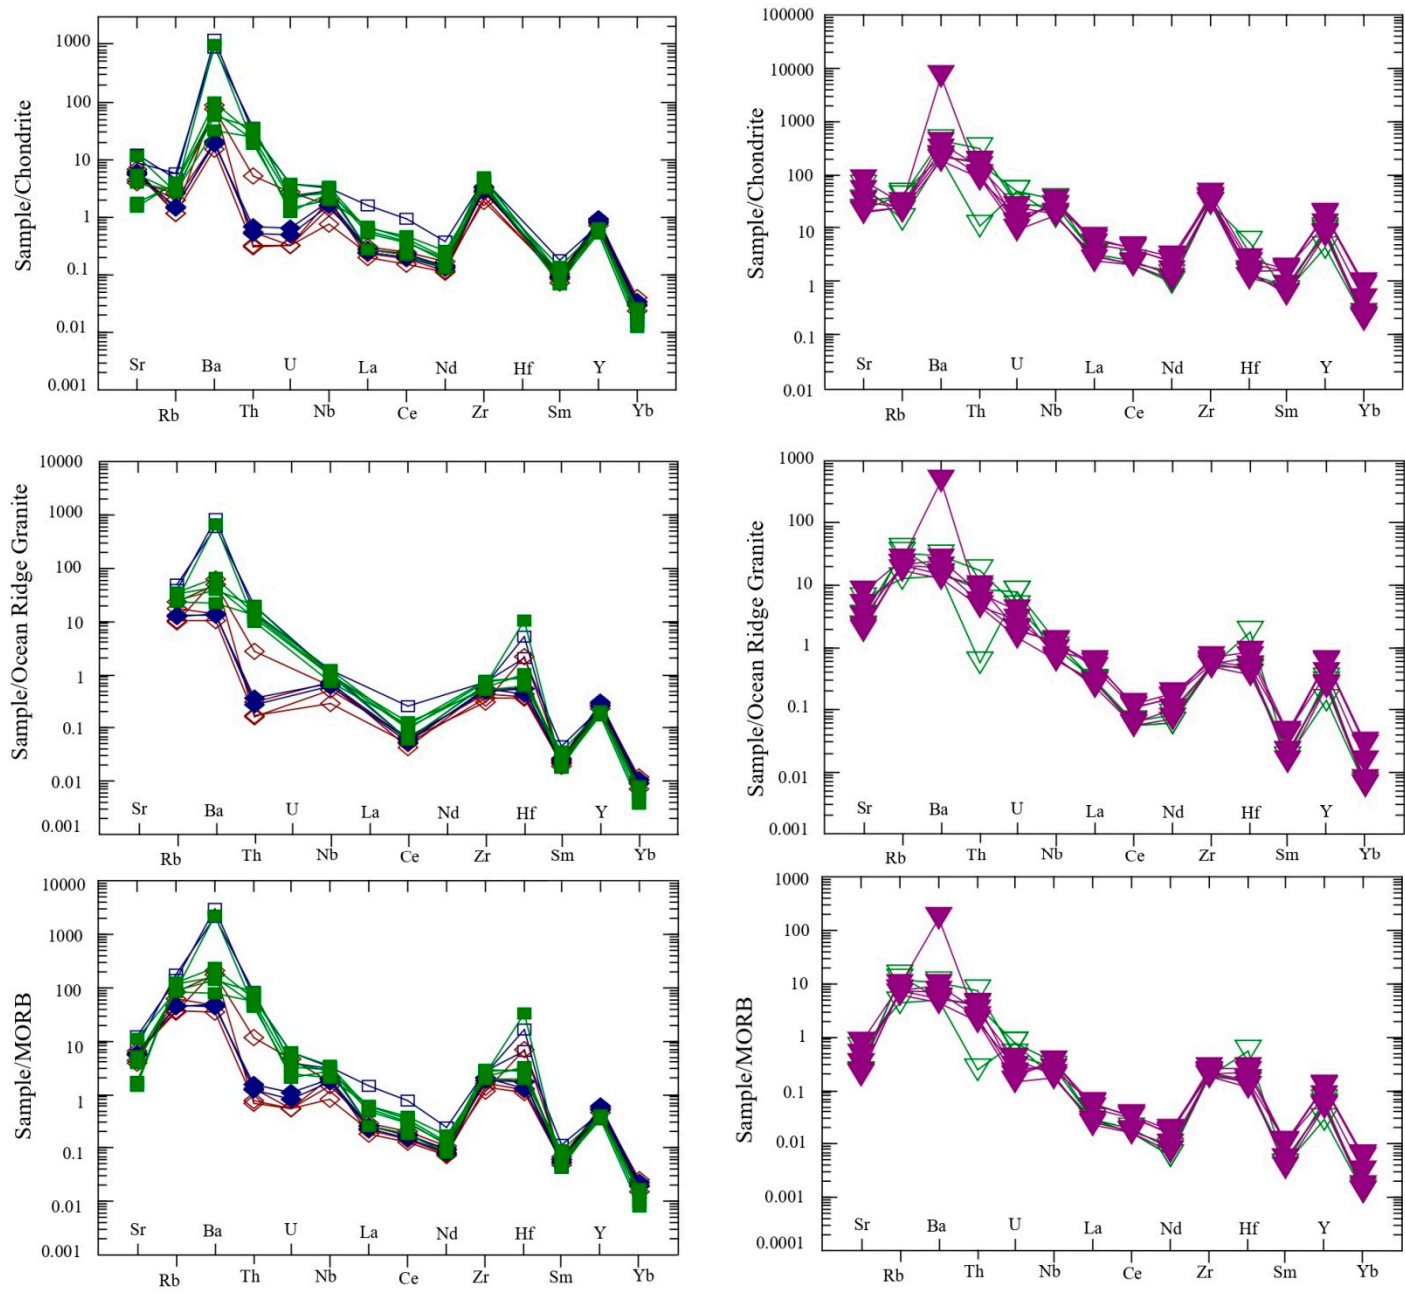

Spider diagram of normalized trace-element patterns of the host rocks using chondrite, MORB, and ocean ridge granite (ORG) values. Symbols as in Figure 11a.
