# Supplementary material
Source: MDPI journal article supplement (https://www.mdpi.com/2076-3263/13/9/283)
Supplement: s1 [file s1]

Archive with 4 entries (4 files):
- SI 1-9.xlsx
- SII 1-4.xlsx
- SIII.xlsx
- SIV.pdf
