# Supplementary material
Source: MDPI journal article supplement (https://www.mdpi.com/2076-3263/13/9/283)
Supplement: s1 [file s1 › SI 1-9.xlsx]

## Sheet: SI 1 K-feldspar
	EMPA and structural formula of K-feldspar in Dokhan volcanics of SGUM prospect												EMPA and structural formula of K-feldspar in quartz feldsapr porphyry of GKZ prospect															EMPA and structural formula of K-feldspar in diorite of GKZ prospect
	Spot No.	147	148	149	95	101	103	19	20	24	38		Spot No.	41	42	54	56	74	84	85	122	123	124	125	126	127		spot No.	35	36	37	38	39	40
	Major oxides (wt%)												Major oxides (wt%)															Major oxides (wt%)
	SiO2	66.021	66.145	65.922	65.764	64.653	66.294	64.805	64.832	64.893	64.34		SiO2	65.166	65.705	65.509	65.567	63.503	65.197	64.892	63.19	64.709	64.334	64.329	65.213	64.311		SiO2	65.434	64.329	64.999	65.043	65.704	64.02
	TiO2	0	0	0	0.022	0.03	0	0	0.022	0.007	0		TiO2	0.028	0	0.003	0.04	0	0.003	0	0.013	0.015	0	0.025	0.017	0.032		TiO2	0.075	0.003	0.03	0.053	0	0
	Al2O3	20.171	19.9	20.512	19.542	18.893	19.557	18.738	18.817	18.944	18.829		Al2O3	19.073	19.061	18.987	19.175	18.854	18.76	18.915	18.88	19.375	19.401	19.113	19.371	19.28		Al2O3	18.815	18.969	19.294	19.156	19.157	19.027
	Cr2O3	0.012	0.027	0.014	0.003	0.017	0.037	0	0	0.019	0		Cr2O3	0	0.008	0.02	0.033	0.015	0.024	0	0	0.006	0.003	0	0.037	0		Cr2O3	0	0.039	0	0.109	0.046	0.024
	FeOt	0.084	0.027	0.062	0.099	0.054	0.017	0.153	0.028	0.28	0.073		FeOt	0.103	0.088	0.126	0.195	0.157	0.077	0.12	0.068	0.073	0.049	0.09	0.117	0.1		FeOt	0.273	0.117	0.216	0.084	0.048	0.078
	MnO	0	0	0.032	0	0.002	0	0.002	0	0.024	0.014		MnO	0.022	0	0	0	0	0	0.013	0.004	0.006	0	0	0.009	0.021		MnO	0	0	0.022	0	0	0.009
	MgO	0.007	0.003	0.007	0.027	0	0.004	0	0	0	0.011		MgO	0	0	0.021	0	0	0	0	0	0.006	0	0	0.018	0		MgO	0	0	0	0	0	0
	CaO	0.579	0.219	0.698	0.201	0.086	0.357	0	0.027	0.06	0.03		CaO	0.052	0.089	0.046	0.111	0.055	0.063	0.061	0.034	0.051	0.092	0.069	0.181	0.156		CaO	0.136	0.101	0.048	0.066	0.057	0.066
	Na2O	7.047	3.101	7.543	4.247	1.102	5.201	0.467	0.417	0.419	0.343		Na2O	0.996	1.575	1.036	2.096	0.262	1.339	0.937	0.521	2.747	2.267	2.138	3.552	2.947		Na2O	1.651	0.945	1.323	0.958	1.18	1.602
	K2O	6.389	12.377	4.843	10.142	14.778	9.236	15.769	15.97	15.844	16.067		K2O	14.995	14.385	15.287	13.693	16.163	14.841	15.505	15.425	12.185	12.949	13.049	10.941	11.608		K2O	13.332	14.067	13.906	14.124	13.877	13.325
	P2O5	0	0	0	0	0	0.004	0.05	0	0.03	0.001		P2O5	0	0	0.023	0.042	0	0.025	0	0	0.001	0.049	0.001	0.041	0.007		P2O5	0	0	0	0	0	0
	F	0	0.076	0	0	0	0	0.109	0	0.065	0.022		F	0.119	0	0.076	0	0	0.033	0.054	0.141	0	0	0	0	0		F	0	0.178	0	0	0	0.099
	Cl	0.081	0.017	0.1	0.041	0.099	0.127	0.001	0.151	0.036	0.106		Cl	0.014	0.056	0	0.006	0.013	0.014	0.019	0.021	0.012	0.011	0	0	0.019		Cl	0.288	0.719	0.004	0.263	0.05	0.091
	SO3--	0	0	0	0.006	0.008	0.006	0.012	0	0.016	0		SO3--	0.025	0	0	0.016	0	0.005	0	0.039	0	0.018	0.023	0	0.015		SO3--	0	0.015	0.009	0.003	0	0
	Total	100.373	101.856	99.71	100.085	99.7	100.811	100.06	100.23	100.602	99.803		Total	100.54	100.954	101.102	100.973	99.019	100.364	100.489	98.272	99.183	99.171	98.837	99.497	98.492		Total	100.058	99.491	100.199	100.144	100.586	98.65
	Structural formula based on 8 oxygen atoms												Structural formula based on 8 oxygen atoms															Structural formula based on 8 oxygen atoms
	Si	2.94551	2.96223	2.94051	2.97178	2.98307	2.97103	2.98694	2.98752	2.97958	2.98086		Si	2.98268	2.98692	2.98496	2.97519	2.97519	2.96929	2.96929	2.988	2.96982	2.97065	2.97413	2.97091	2.96854		Si	2.9952	2.98527	2.97658	2.98625	2.99402	2.97731
	Al	1.06073	1.05045	1.07844	1.04087	1.02748	1.03308	1.01798	1.02204	1.02524	1.02822		Al	1.02897	1.02134	1.01975	1.02557	1.02557	1.03911	1.03911	1.01341	1.04588	1.0484	1.04155	1.04017	1.04897		Al	1.01514	1.03758	1.04143	1.03664	1.02893	1.04298
	Ti	0	0	0	0.000747664	0.001041	0	0	0.000762428	0.000241719	0		Ti	0.000963827	0	0.000102805	0.00136504	0.00136504	0	0	0.000103402	0.000459494	0.000517886	0.000869259	0.000582452	0.00111087		Ti	0.0025819	0.000104702	0.00103321	0.00183003	0	0
	Fe	0.00313425	0.00101126	0.00231291	0.00374144	0.00208374	0.000637173	0.00589772	0.00107908	0.010752	0.00282852		Fe	0.00394274	0.00334567	0.00480157	0.00740014	0.00740014	0.0061395	0.0061395	0.00295134	0.0026728	0.00280276	0.00347994	0.00445776	0.00386041		Fe	0.0104511	0.00454086	0.00827257	0.00322538	0.00182927	0.00303374
	Mn	0	0	0.00120907	0	7.81655e-05	0	7.80833e-05	0	0.000933424	0.000549414		Mn	0.000852942	0	0	0	0	0	0	0	0.00015924	0.000233319	0	0.000347303	0.000821086		Mn	0	0	0.000853385	0	0	0.000354537
	Mg	0.00046555	0.000200278	0.000465456	0.00181879	0	0.000267228	0	0	0	0.000759701		Mg	0	0	0.00142642	0	0	0	0	0	0	0.000410609	0	0.00122241	0		Mg	0	0	0	0	0	0
	Ca	0.0276791	0.010509	0.0333612	0.00973237	0.00425174	0.0171433	0	0.00133315	0.0029519	0.00148928		Ca	0.00255025	0.0043352	0.00224589	0.00539693	0.00539693	0.00275559	0.00275559	0.00309376	0.0017122	0.00250872	0.0034182	0.00883544	0.00771573		Ca	0.00667046	0.00502219	0.0023553	0.00324687	0.00278312	0.00328887
	Na	0.609626	0.26928	0.652404	0.372127	0.0985908	0.451961	0.0417364	0.0372595	0.0373037	0.0308131		Na	0.0883946	0.138831	0.091533	0.184417	0.184417	0.0237542	0.0237542	0.118991	0.0474788	0.244527	0.191665	0.313768	0.263766		Na	0.146538	0.0850334	0.117477	0.0852849	0.104262	0.144461
	K	0.363581	0.707012	0.275547	0.584576	0.869719	0.527966	0.927066	0.938674	0.92792	0.949477		K	0.875429	0.834112	0.888482	0.792533	0.792533	0.963983	0.963983	0.86757	0.924689	0.713513	0.76952	0.635772	0.683447		K	0.778407	0.83266	0.812274	0.827129	0.806579	0.790433
	End members												End members															End members
	Or	36.3259	71.6468	28.6636	60.4779	89.4256	52.9518	95.692	96.051	95.8421	96.7098		Or	90.5891	85.3505	90.4528	80.6775	80.6775	97.3236	97.3236	87.6639	94.949	74.2818	79.7758	66.3385	71.5705		Or	83.5545	90.2402	87.144	90.3314	88.2835	84.2514
	Ab	60.9087	27.2882	67.866	38.5051	10.1372	45.3289	4.30804	3.81263	3.85298	3.13849		Ab	9.14703	14.2059	9.3186	18.7731	18.7731	2.39822	2.39822	12.0235	4.87522	25.457	19.8698	32.7396	27.6216		Ab	15.7294	9.21556	12.6134	9.32404	11.4119	15.398
	An	2.75546	1.06495	3.47038	1.00704	0.437169	1.71937	0	0.136416	0.304893	0.151692		An	0.263899	0.4436	0.228645	0.549391	0.549391	0.278204	0.278204	0.32261	0.175812	0.261175	0.354363	0.921918	0.80799		An	0.71601	0.544283	0.252686	0.354593	0.314624	0.350557

## Sheet: SI 2 Plagioclase
	EMPA and structural formula of plagioclase in quartz-feldsapr porphyry of GKZ prospect																			EMPA and structural formula of plagioclase in Dokhan volcanics of SGUM prospect																					EMPA and structural formula of plagioclase in diorite of GKZ prospect
	Spot No	105	106	107	108	109	110	111	112	113	114	115	116	117	118	119	120	121		Spot No.	2	3	4	5	6	7	8	9	10	21	36	150	96	97	98	99	100	102	104		Spot No.	37	38	39	40	41	42	43	44
	Major oxides (wt%)																			Major oxides (wt%)																					Major oxides (wt%)
	SiO2	62.731	62.274	60.961	60.736	60.298	60.526	59.488	60.41	60.723	60.885	60.143	60.04	61.437	61.097	61.763	62.95	62.283		SiO2	67.826	67.379	67.661	68.269	68.104	67.712	68.358	68.241	68.07	68.467	68.684	66.873	68.437	68.441	68.899	68.779	69.099	68.638	68.789		SiO2	56.611	54.296	54.307	59.269	57.647	57.944	57.208	58.946
	TiO2	0.008	0.045	0.047	0.028	0.048	0.068	0.048	0	0.06	0.05	0.013	0.02	0.027	0.051	0.032	0.028	0.003		TiO2	0	0.002	0.028	0	0.015	0.003	0.012	0	0.002	0	0.015	0	0.003	0.043	0	0	0	0.017	0		TiO2	0.108	0.07	0.086	0	0.133	0.079	0.078	0.017
	Al2O3	23.887	24.1	24.636	25.297	25.398	25.455	26.145	25.493	25.325	24.881	25.388	25.553	24.635	24.744	24.083	23.476	23.934		Al2O3	20.789	20.846	20.781	20.354	20.606	20.615	20.668	20.523	21.026	20.393	20.313	20.98	20.664	20.583	20.66	20.553	20.285	20.157	20.56		Al2O3	27.51	29.631	28.485	26.36	27.241	26.318	27.634	26.403
	Cr2O3	0.027	0.062	0.031	0.024	0	0	0	0.004	0	0.012	0.012	0.023	0.034	0.048	0.007	0.015	0.039		Cr2O3	0.032	0	0	0.03	0	0.004	0.012	0	0.019	0.016	0	0.006	0.027	0	0.032	0.021	0.018	0	0		Cr2O3	0	0	0.032	0.025	0.016	0.059	0.011	0.007
	FeOt	0.165	0.173	0.229	0.192	0.189	0.188	0.187	0.168	0.181	0.185	0.124	0.175	0.199	0.158	0.204	0.211	0.137		FeOt	0.113	0.074	0.089	0.09	0.078	0.137	0.075	0.08	0.111	0.106	0.091	0.159	0.058	0.08	0.092	0.051	0.039	0.08	0.064		FeOt	0.375	0.493	0.392	0.474	0.475	0.336	0.356	0.428
	MnO	0.014	0	0	0.004	0	0.005	0	0	0	0.005	0.001	0.002	0	0.005	0.007	0.024	0		MnO	0	0.008	0.006	0.024	0.023	0	0	0	0	0	0.023	0.015	0	0	0	0.015	0	0.018	0		MnO	0	0	0	0.001	0.038	0	0	0.019
	MgO	0.003	0.023	0.004	0.018	0.011	0.006	0	0.001	0	0.012	0.007	0.019	0.011	0	0.009	0.004	0.016		MgO	0.012	0	0.005	0.003	0	0.018	0.023	0	0.028	0	0	0	0.019	0	0.015	0	0.001	0	0		MgO	0.011	0.008	0.011	0.006	0.014	0.013	0.014	0.022
	CaO	4.772	4.995	6.084	6.508	6.819	6.878	7.524	6.735	6.72	6.204	7.054	7.123	6.153	6.12	5.838	4.727	5.319		CaO	0.917	0.975	1.016	0.599	0.611	0.778	0.779	0.776	1.089	0.81	0.717	0.851	0.983	0.862	0.7	0.805	0.527	0.56	0.69		CaO	8.693	11.07	10.983	7.603	8.35	8.172	8.667	7.512
	Na2O	8.38	8.242	7.453	7.399	7.125	6.891	6.725	6.989	7.066	7.208	6.911	7.019	7.369	7.636	7.926	8.136	8.004		Na2O	11.232	11.239	10.955	11.29	11.452	11.019	10.903	11.242	10.711	11.032	11.016	10.753	10.795	10.938	10.939	10.906	11.086	10.907	10.992		Na2O	6.321	5.057	4.939	7.064	6.713	6.768	6.521	6.958
	K2O	0.475	0.635	0.496	0.38	0.678	0.758	0.602	0.658	0.736	0.711	0.723	0.588	0.575	0.324	0.348	0.615	0.331		K2O	0.195	0.222	0.132	0.204	0.184	0.2	0.215	0.18	0.268	0.068	0.088	0.123	0.213	0.134	0.143	0.129	0.072	0.075	0.133		K2O	0.297	0.35	0.353	0.417	0.361	0.439	0.34	0.506
	P2O5	0.008	0	0.025	0.025	0.092	0.093	0.066	0.037	0.02	0.03	0.032	0.082	0.018	0.049	0.041	0.019	0.007		P2O5	0	0.015	0	0	0	0.057	0	0	0	0.001	0.039	0	0	0.024	0	0.019	0	0	0		P2O5	0	0	0	0	0	0	0	0
	Total	100.475	100.549	99.975	100.646	100.778	100.904	100.788	100.495	100.861	100.237	100.434	100.684	100.488	100.272	100.259	100.205	100.073		Total	101.247	100.842	100.744	100.886	101.12	100.549	101.082	101.061	101.367	100.91	101.01	99.819	101.283	101.137	101.502	101.349	101.152	100.481	101.289		Total	100.082	101.064	99.683	101.255	101.04	100.211	100.861	100.912
	Structural formula based on 8 oxygen atoms																			Structural formula based on 8 oxygen atoms																					Structural formula based on 8 oxygen atoms
	Si	2.76611	2.75013	2.71027	2.68518	2.66688	2.66995	2.63303	2.67535	2.68257	2.7021	2.66855	2.65796	2.71767	2.70668	2.73406	2.78084	2.75692		Si	2.9407	2.93281	2.942	2.96271	2.95107	2.94787	2.95738	2.95608	2.9408	2.96576	2.97059	2.93302	2.95712	2.95866	2.96545	2.96618	2.98073	2.98031	2.96723		Si	2.58843	2.47313	2.50522	2.66807	2.61026	2.64399	2.59417	2.66505
	Al	1.2415	1.25448	1.29101	1.31824	1.32403	1.32352	1.364	1.33073	1.3187	1.30154	1.32775	1.33336	1.28445	1.29207	1.25658	1.22237	1.24873		Al	1.0624	1.0695	1.06505	1.04115	1.05244	1.05785	1.05394	1.04788	1.07069	1.0412	1.03552	1.0846	1.05242	1.04878	1.04811	1.04475	1.03139	1.03162	1.04533		Al	1.4826	1.59083	1.54884	1.39866	1.45388	1.41548	1.47701	1.40703
	Ti	0.000265297	0.00149457	0.0015715	0.00093098	0.0015966	0.00225593	0.0015978	0	0.00199345	0.00166884	0.000433799	0.000665875	0.000898227	0.00169919	0.00106533	0.000930236	9.98691e-05		Ti	0	6.54703e-05	0.000915626	0	0.000488825	9.82243e-05	0.00039044	0	6.49822e-05	0	0.000487903	0	9.74889e-05	0.00139799	0	0	0	0.000555138	0		Ti	0.00371377	0.0023979	0.00298363	0	0.00452913	0.00271103	0.00266007	0.000578037
	Fe	0.00608481	0.00638952	0.00851476	0.00709911	0.00699098	0.00693576	0.00692218	0.00622238	0.00668732	0.00686654	0.00460137	0.00647919	0.007362	0.00585396	0.00755241	0.00779539	0.00507166		Fe	0.00409741	0.0026938	0.00323646	0.0032665	0.00282668	0.00498814	0.00271365	0.00289825	0.00401058	0.00384004	0.00329158	0.00583226	0.00209595	0.00289231	0.00331162	0.00183944	0.00140699	0.0029051	0.00230881		Fe	0	0	0.00123457	0.000941205	0.000605903	0.00225154	0.000417168	0.000264682
	Mn	0.00052291	0	0	0.000149795	0	0.000186828	0	0	0	0.000187963	3.75838e-05	7.49978e-05	0	0.000187628	0.000262476	0.000898053	0		Mn	0	0.000294958	0.000220987	0.000882242	0.0008442	0	0	0	0	0	0.000842609	0.000557271	0	0	0	0.000547953	0	0.000662033	0		Mn	0.0145237	0.0190211	0.0153175	0.0180742	0.0182185	0.0129868	0.0136742	0.016391
	Mg	0.000197196	0.00151413	0.000265101	0.00118628	0.000725242	0.000394549	0	6.60178e-05	0	0.000793892	0.000462996	0.00125386	0.000725353	0	0.000593898	0.000263408	0.00105576		Mg	0.000775578	0	0.000324089	0.000194078	0	0.00116816	0.00148332	0	0.00180325	0	0	0	0.00122383	0	0.000962405	0	6.43044e-05	0	0		Mg	0	0	0	6.71055e-05	0.00256496	0	0	0.00128054
	Ca	0.225467	0.236361	0.289831	0.308297	0.323158	0.3251	0.356836	0.319598	0.318098	0.295023	0.335366	0.337882	0.291641	0.290511	0.27691	0.223748	0.252277		Ca	0.0426009	0.0454734	0.0473361	0.0278539	0.0283688	0.0362924	0.0361118	0.0360186	0.0504117	0.0375953	0.0332277	0.0399934	0.045512	0.0399283	0.0322827	0.037199	0.0243588	0.0260542	0.0318915		Ca	0.000538918	0.000390447	0.000543723	0.000289411	0.000679251	0.000635608	0.000680244	0.00106578
	Na	0.716494	0.705765	0.6425	0.63428	0.611035	0.589418	0.577164	0.60016	0.605274	0.620277	0.594582	0.602509	0.632057	0.65594	0.680322	0.696901	0.686977		Na	0.944263	0.948565	0.923629	0.950035	0.962206	0.930176	0.914628	0.944268	0.897263	0.926594	0.923829	0.914481	0.904444	0.916849	0.912926	0.911984	0.927271	0.918295	0.919369		Na	0.770701	0.977702	0.982409	0.663643	0.73312	0.723038	0.762065	0.658548
	K	0.0267159	0.0357692	0.0281276	0.0214289	0.0382489	0.04265	0.0339869	0.0371695	0.0414729	0.0402485	0.0409183	0.0332027	0.0324432	0.0183084	0.0196493	0.0346533	0.0186884		K	0.010784	0.0123254	0.00732095	0.0112924	0.0101698	0.0111061	0.0118644	0.00994564	0.0147684	0.0037571	0.00485466	0.00688111	0.0117394	0.00738879	0.00785059	0.0070961	0.00396162	0.00415381	0.00731767		K	0.368647	0.293806	0.290616	0.40561	0.387716	0.393914	0.377177	0.401259
	End members																			End members																					End members
	Or	2.75798	3.65778	2.91856	2.2229	3.93329	4.45585	3.51109	3.88425	4.2984	4.21208	4.21461	3.41033	3.39314	1.89772	2.01144	3.62746	1.95089		Or	1.08094	1.22475	0.748345	1.14159	1.01622	1.13609	1.23253	1.00437	1.53447	0.388152	0.504689	0.715772	1.2207	0.76634	0.823726	0.742054	0.414573	0.437933	0.763389		Or	32.3407	23.0998	22.819	37.9237	34.5707	35.2468	33.088	37.8235
	Ab	73.9363	72.1718	66.8951	65.7963	62.8351	61.5794	59.6252	62.7174	62.7328	64.9132	61.2424	61.8851	66.105	67.99	69.6423	72.9508	71.7138		Ab	94.6489	94.2567	94.413	96.0426	96.149	95.1514	95.016	95.3582	93.2276	95.7278	96.041	95.1241	94.0468	95.0924	95.789	95.368	97.0363	96.8152	95.9096		Ab	67.6121	76.8695	77.1383	62.0492	65.3687	64.6963	66.8523	62.0761
	An	23.2757	24.1704	30.1763	31.9808	33.2316	33.9648	36.8638	33.3983	32.9688	30.8747	34.543	34.7046	30.5019	30.1123	28.3463	23.4217	26.3353		An	4.27013	4.51859	4.83868	2.81585	2.83477	3.7125	3.75147	3.63739	5.23789	3.88403	3.45434	4.1601	4.73248	4.14123	3.38727	3.88997	2.54908	2.74688	3.32696		An	0.0472782	0.030698	0.0426929	0.0270593	0.0605655	0.0568733	0.0596746	0.100463
[truncated: 2 more columns]

## Sheet: SI 3 Apatite 
	EMPA and structural formula in apatite of diorite of GKZ prospect
	Spot No.	1	2	6	28	29	30	31
	Major oxides (wt%)
	SiO2	0.115	0.074	0	0.021	0.078	0.193	0.156
	TiO2	0.021	0.01	0	0	0	0.012	0
	Al2O3	0.01	0	0.005	0	0.001	0.013	0.001
	FeOt	0.037	0.07	0.095	0.046	0.047	0.041	0.108
	MnO	0.065	0.076	0.008	0.008	0.04	0.028	0.034
	CaO	55.963	55.544	56.277	56.483	56.15	56.104	55.757
	Na2O	0.084	0.1	0.041	0.027	0	0.103	0.058
	P2O5	38.447	38.163	38.239	38.536	38.465	37.983	38.283
	F	1.716	1.113	2.215	1.963	1.819	1.422	1.514
	Cl	6.686	7.788	2.97	5.229	5.77	9.735	6.49
	SO3--	0	0	0.012	0	0	0.027	0.006
	Total	100.917	100.728	98.266	100.311	100.364	102.865	100.321
	Structural formula based on 25 oxygen atoms
	Ca	9.986	9.984	10.228	10.1044	10.0556	9.91622	10.0133
	Na	0.027	0.033	0.013	0.0087406	0	0.032944	0.0188492
	Mn	0.009	0.011	0.001	0.00113135	0.00566283	0.00391225	0.00482697
	Fe	0.005	0.01	0.013	0.00642289	0.00656956	0.0056561	0.0151385
	P	5.42	5.4	5.492	5.44742	5.44322	5.30487	5.43273
	Si	0.019	0.012	0	0.00350662	0.0130386	0.0318411	0.0261506
	Cl	1.887	2.215	0.854	1.4798	1.63465	2.72195	1.84381
	F	0.9	0.591	1.188	1.03649	0.961488	0.741833	0.802526

## Sheet: SI 4 Phlogopite
	EMPA and structural formula of phlogopite in quartz-feldsapr porphyry of GKZ prospect
	Spot No.	44	45	46	47	60	61	140	141
	Major oxides (wt%)
	SiO2	37.967	32.551	37.26	38.069	37.493	37.731	36.914	36.779
	TiO2	4.106	1.927	3.828	4.128	4.108	4.022	3.901	3.971
	Al2O3	13.742	15.421	13.789	13.809	13.759	14.045	13.785	13.973
	Cr2O3	0.07	0.102	0.075	0.068	0.071	0.068	0.058	0.064
	FeOt	13.84	16.732	14.174	13.787	13.907	13.731	13.285	13.332
	MnO	0.207	0.141	0.198	0.263	0.154	0.145	0.215	0.219
	MgO	13.914	16.41	13.237	12.971	12.914	12.84	13.533	13.315
	CaO	0.117	0.195	0.105	0.104	0.088	0.071	0.013	0.028
	Na2O	0.146	0.017	0.108	0.133	0.179	0.167	0.197	0.129
	K2O	9.1	3.442	8.638	9.154	9.313	9.322	9.331	9.239
	P2O5	0.024	0.054	0	0	0	0	0.012	0
	F	0.451	0.387	0.761	0.719	0.355	0.537	0.565	0.585
	Cl	0.205	0.099	0.241	0.262	0.274	0.289	0.23	0.202
	SO3--	0.053	0.029	0.048	0.084	0.069	0.073	0.03	0.053
	Total	93.706	87.322	92.088	93.189	92.473	92.75	91.779	91.597
	Structural formula based on 8 oxygen atoms
	Si	5.88899	5.52433	5.89869	5.92491	5.90216	5.90816	5.88019	5.86754
	Al iv	2.11101	2.47567	2.10131	2.07509	2.09784	2.09184	2.11981	2.13246
	Al vi	0.401383	0.609146	0.471732	0.458142	0.455151	0.500416	0.468454	0.495068
	Ti	0.478971	0.245953	0.455764	0.483176	0.486347	0.473643	0.467338	0.476443
	Cr	0.0251407	0.0132843	0.030166	0.0322404	0.0341035	0.03578	0.0289679	0.0254798
	Fe	0.00908047	0.0144774	0.00993	0.00885105	0.00934748	0.00890509	0.00772687	0.00853909
	Mn	1.81837	2.40533	1.90071	1.81757	1.85441	1.82124	1.79256	1.80162
	Mg	0.0478624	0.0356717	0.0467269	0.0610177	0.0361386	0.0338463	0.0510538	0.0520822
	Ca	2.3125	2.98413	2.24541	2.16311	2.17829	2.15434	2.30987	2.2761
	Na	0.0351886	0.0641697	0.0322316	0.0313852	0.0268611	0.0215572	0.00401536	0.00866153
	K	0.0288853	0.00368004	0.0218085	0.0264029	0.035942	0.0333549	0.0400272	0.0262503

## Sheet: SI 5 pyroxene
	EMPA and structural formual of pyroxene in diorite of GKZ prospect
	Spot No	24	25	28	29	30	31
	Major oxides (wt%)
	SiO2	54.129	53.66	53.05	53.237	52.849	53.097
	TiO2	0.255	0.315	0.331	0.33	0.341	0.223
	Al2O3	0.93	0.946	1.212	1.127	0.975	1.664
	Cr2O3	0.054	0.047	0.156	0.111	0.08	0.128
	FeOt	18.244	18.994	18.958	18.781	18.755	18.752
	MnO	0.554	0.559	0.332	0.382	0.396	0.352
	MgO	24.593	24.297	23.912	24.458	24.428	24.149
	CaO	1.883	1.79	2.228	2.361	2.085	2.747
	Na2O	0.048	0.031	0.015	0.052	0.037	0.076
	K2O	0	0	0	0.002	0.012	0
	P2O5	0	0	0	0	0	0
	F	0	0.033	0	0.017	0	0
	Cl	0.042	0	0.008	0	0.012	0
	SO3--	0.005	0.005	0.006	0.021	0	0.024
	BaO	0.012	0.064	0.042	0.041	0.012	0.029
	Total	100.74	100.727	100.248	100.913	99.979	101.241
	Structural formula based on 6 oxygen atoms
	Si	1.91093	1.91446	1.9459	1.93545	1.93808	1.92383
	Ti	0.00677148	0.0084535	0.00913257	0.00902425	0.00940628	0.00607759
	Al	0.0386948	0.039778	0.0523955	0.0482889	0.04214	0.0710569
	Cr	0.00150724	0.00132577	0.00452413	0.00319055	0.00231952	0.00366676
	Fe3+	0.127686	0.115204	0.0340786	0.0633375	0.0637698	0.0707946
	Fe2+	0.529038	0.541027	0.547467	0.507671	0.511414	0.497405
	Mn	0.0165657	0.0168925	0.0103148	0.0117629	0.0123003	0.0108025
	Mg	1.2943	1.29228	1.30755	1.32555	1.33546	1.30438
	Ca	0.0712258	0.0684263	0.0875636	0.091968	0.0819244	0.106642
	Na	0.0032855	0.0021444	0.00106678	0.00366537	0.00263076	0.00533897
	End members
	En	0.683165	0.679528	0.6731	0.68853	0.692379	0.683485
	Fs	0.27924	0.284491	0.281824	0.263699	0.265147	0.260636
	Wo	0.0375949	0.0359809	0.0450758	0.0477708	0.0424743	0.0558796

## Sheet: SI 6 chlorite
	EMPA and structural formual of chlorite in alteration zones of GKZ prospect								EMPA and structural formual of chlorite in diorite of GKZ prospect						EMPA and structural formual of chlorite in quartz feldsapr porphyry of GKZ prospect
	Spot No.	66	67	68	77	78	83		Spot No.	3	4	5			Spot No.	45	57
	Major oxides (wt%)								Major oxides (wt%)						Major oxides (wt%)
	SiO2	25.373	25.447	24.234	24.827	25.557	23.785		SiO2	27.609	28.008	27.898			SiO2	32.551	27.623
	TiO2	0.03	0	0	0.04	0.03	0.006		TiO2	0.014	0	0			TiO2	1.927	0.248
	Al2O3	20.191	20.819	21.088	22.029	22.496	19.827		Al2O3	19.757	19.672	20.289			Al2O3	15.421	16.07
	Cr2O3	0.058	0.065	0.073	0.165	0.081	0.088		Cr2O3	0.027	0.033	0.005			Cr2O3	0.102	0.086
	FeOt	34.708	35.094	35.047	33.61	34.042	35.043		FeOt	24.038	24.228	23.49			FeOt	16.732	17.086
	MnO	0.28	0.308	0.299	0.208	0.149	0.347		MnO	0.158	0.134	0.22			MnO	0.141	0.24
	MgO	8.808	8.356	8.334	7.517	7.914	7.616		MgO	18.317	18.293	18.683			MgO	16.41	16.579
	CaO	0.131	0.468	0.158	0.196	0.129	0.162		CaO	0.086	0.081	0.09			CaO	0.195	0.172
	Na2O	0	0.032	0.016	0.175	0.04	0.003		Na2O	0.039	0	0.014			Na2O	0.017	0.02
	K2O	0.009	0.001	0.012	0.02	0.005	0.038		K2O	0	0	0.003			K2O	3.442	0.023
	P2O5	0	0	0	0	0	0		P2O5	0	0	0			P2O5	0.054	0
	F	0	0.061	0.046	0	0.077	0		F	0	0	0			F	0.387	0.009
	Cl	0	0.003	0.003	0.034	0	0.029		Cl	0.032	0.006	0.072			Cl	0.099	0.045
	SO3--	0.031	0.04	0.006	0.016	0.006	0.063		SO3--	0.025	0.005	0			SO3--	0.029	0.014
	Total	89.648	90.705	89.377	88.871	90.505	87.061		Total	90.1	90.466	90.787			Total	87.322	78.201
	Structural formula based on 28 oxygen atoms								Structural formula based on 28 oxygen atoms						Structural formula based on 28 oxygen atoms
	Si	5.49377	5.44425	5.29023	5.3696	5.39887	5.36991		Si	5.5975	5.65841	5.59409			Si	6.45443	6.20218
	Al iv	2.50623	2.55575	2.70977	2.6304	2.60113	2.63009		Al iv	2.4025	2.34159	2.40591			Al iv	1.54557	1.79782
	Al vi	2.65549	2.71022	2.72356	3.0156	3.03522	2.6505		Al vi	2.32579	2.34353	2.39262			Al vi	2.16726	2.49278
	Ti	0.00488512	0	0	0.00650629	0.00476617	0.00101876		Ti	0.00213465	0	0			Ti	0.287363	0.0418775
	Cr	0.00992921	0.0109952	0.0125997	0.0282157	0.013529	0.0157085		Cr	0.00432808	0.00527126	0.000792711			Cr	0.0159913	0.0152672
	Fe3+	0.0924204	0.113364	0.0316061	0.207636	0.277513	0.0229285		Fe3+	0	0.0053803	0.00661436			Fe3+	0.485393	0.452461
	Fe2+	6.19255	6.16592	6.36686	5.87178	5.73677	6.59376		Fe2+	4.10379	4.08822	3.93265			Fe2+	2.28931	2.75594
	Mn	0.0513532	0.0558166	0.0552881	0.0381059	0.0266619	0.0663597		Mn	0.0271338	0.0229313	0.0373672			Mn	0.0236823	0.0456452
	Mg	2.84292	2.66495	2.71202	2.42355	2.49218	2.56319		Mg	5.53588	5.50917	5.5846			Mg	4.85056	5.54908
	Ca	0.0303923	0.107286	0.0369573	0.0454222	0.0291996	0.0391898		Ca	0.0186825	0.0175344	0.0193372			Ca	0.0414307	0.0413805
	Na	0	0.0265499	0.013545	0.14678	0.032769	0.00262661		Na	0.0306633	0	0.0108867			Na	0.0130723	0.0174146
	K	0.00497118	0.000545784	0.00668266	0.0110349	0.00269453	0.021886		K	0	0	0.00153461			K	1.7411	0.0131741
	T (°C)*	341.55	349.53	374.32	361.54	356.83	361.49		T (°C)*	324.859	315.053	325.408			T (°C)*	186.901	227.512
	*Temperature was calculated according to Jowett (1991) equation

## Sheet: SI 7 Amphiboles
		EMPA and structural formual of amphiboles in diorite of GKZ prospect											EMPA and structural formual of amphiboles in quartz feldspar porphyry of GKZ prospect
		Spot No.	22	23	33	34	35	36	26	27	32		Spot No.	51	52	53	65	66	67	68	69	128	129	130	131	132
		Major oxides (wt%)											Major oxides (wt%)
		SiO2	56.282	55.896	55.537	55.578	53.304	55.279	55.341	57.539	54.193		SiO2	48.377	50.868	48.086	51.641	51.598	54.196	53.661	53.677	49.76	49.46	51.423	50.621	51.083
		TiO2	0.125	0.186	0.237	0.173	0.191	0.163	0.159	0.123	0.084		TiO2	0.7	0.539	0.93	0.694	0.648	0.203	0.284	0.417	1.045	0.501	0.454	0.679	0.77
		Al2O3	0.892	1.231	1.369	1.18	2.427	1.184	1.101	0.667	1.12		Al2O3	7.649	2.853	4.958	4.121	3.731	2.507	2.853	2.559	5.387	5.943	5.928	4.093	4.121
		FeOt	7.83	7.647	8.532	8.477	9.829	8.452	14.823	12.692	15.349		FeOt	9.037	8.115	10.329	9.623	0.017	0	0.063	0.121	0.067	0.028	0.595	0.311	0.043
		MnO	0.177	0.203	0.346	0.328	0.307	0.391	0.602	0.701	0.708		MnO	0.233	0.399	0.36	0.337	9.801	8.297	8.64	9.831	10.473	11.018	6.148	10.052	9.714
		MgO	20.73	20.513	19.744	20.332	16.579	19.915	21.781	22.228	20.763		MgO	14.421	12.265	13.023	14.829	0.412	0.322	0.271	0.387	0.443	0.444	0.161	0.458	0.438
		CaO	12.333	12.89	11.726	11.465	14.004	11.513	6.475	7.259	5.648		CaO	11.053	20.42	12.211	12.285	14.711	16.296	15.76	15.168	13.707	13.318	16.184	14.631	14.184
		Na2O	0.152	0.21	0.23	0.169	0.468	0.175	0.186	0.139	0.198		Na2O	1.931	0.86	1.254	1.16	12.272	12.551	12.611	12.602	11.746	11.601	12.374	11.534	11.765
		K2O	0.045	0.047	0.064	0.038	0.144	0.066	0.053	0.044	0.044		K2O	0.321	0.071	0.494	0.34	1.067	0.666	0.602	0.678	1.203	1.461	1.166	1.181	1.022
		P2O5	0	0	0	0	0	0	0	0	0		P2O5	0.256	0.252	0.072	0.149	0.333	0.176	0.192	0.187	0.586	0.384	0.399	0.375	0.382
		F	0.075	0.019	0.225	0.113	0.15	0.206	0	0	0.192		F	0.325	0	0.173	0.306	0.157	0.227	0.146	0.14	0.064	0.028	0.106	0.037	0.064
		Cl	0.07	0.026	0.173	0.107	0.405	0.173	0.155	0.078	0.191		Cl	0.044	0.036	0.109	0.138	0.306	0.369	0.216	0.266	0.294	0.251	0.384	0.233	0.214
		SO3--	0.015	0.01	0	0.015	0.006	0.037	0	0	0		SO3--	0.03	0	0.027	0	0.053	0.039	0.051	0.062	0.117	0.069	0.057	0.08	0.072
		Total	98.739	98.953	98.082	97.935	97.688	97.5	100.699	101.471	98.366		Total	95.074	97.153	91.939	95.516	94.976	95.685	95.247	95.969	94.754	94.384	95.221	94.169	93.773
		Structural formula based on 23 oxygen atoms											Structural formula based on 23 oxygen atoms
		Si	7.69748	7.67282	7.66304	7.64375	7.66417	7.65332	7.60937	7.80686	7.66765		Si	7.20167	7.51149	7.4074	7.58676	7.62509	7.84759	7.81338	7.81646	7.41685	7.40057	7.48298	7.5678	7.62487
		Al iv	0.143782	0.199156	0.222629	0.191269	0.33583	0.193198	0.178422	0.10666	0.186766		Al iv	0.798332	0.488509	0.592601	0.413244	0.374911	0.15241	0.186619	0.183543	0.583148	0.599433	0.517021	0.432195	0.375133
		Al vi	0	0	0	0	0.075448	0	0	0	0		Al vi	0.543688	0.00801873	0.307547	0.300306	0.274916	0.275432	0.302982	0.255647	0.36319	0.448605	0.499662	0.288981	0.349835
		Ti	0.0128593	0.0192051	0.0245978	0.0178969	0.020657	0.0169749	0.0164448	0.012553	0.00893981		Ti	0.078383	0.0598687	0.10776	0.0766921	0.0720305	0.0221103	0.0311048	0.0456759	0.117162	0.0563869	0.0496938	0.0763552	0.0864522
		Fe3+	0.766409	0.55148	0.858667	0.974993	0	0.978599	0.504783	0.208288	0.397786		Fe3+
		Fe2+	0.129156	0.326372	0.125855	0	1.18187	0	1.19971	1.23184	1.41838		Fe2+	1.12506	1.00213	1.33064	1.1823	1.21126	1.00472	1.05208	1.19722	1.30547	1.3787	0.748181	1.25675	1.21258
		Mn	0.020504	0.0236024	0.0404372	0.0382088	0.0373878	0.0458513	0.0701107	0.0805597	0.0848474		Mn	0.0293789	0.0499045	0.0469716	0.041935	0.0515698	0.0394921	0.0334222	0.047733	0.0559279	0.0562703	0.019844	0.057995	0.0553753
		Mg	4.22656	4.19771	4.06128	4.16862	3.55363	4.11035	4.46466	4.49597	4.37943		Mg	3.20035	2.69996	2.99066	3.24774	3.24088	3.5177	3.42094	3.29275	3.04572	2.9707	3.51084	3.26078	3.15619
		Ca	1.8072	1.89577	1.73351	1.68941	2.15732	1.70779	0.953892	1.05523	0.856193		Ca	1.76292	3.23069	2.01538	1.93372	1.94305	1.94718	1.96738	1.96616	1.8758	1.85979	1.92923	1.84747	1.88151
		Na	0.040307	0.0558922	0.0615325	0.0450659	0.130469	0.046977	0.0495875	0.0365668	0.0543178		Na	0.557358	0.246228	0.374544	0.330428	0.305727	0.186982	0.169955	0.19143	0.347666	0.423856	0.328983	0.342331	0.295777
		K	0.00785146	0.00823058	0.0112657	0.00666723	0.0264135	0.0116571	0.00929686	0.00761597	0.00794201		K	0.0609618	0.0133751	0.0970806	0.0637234	0.0627791	0.0325117	0.0356648	0.0347394	0.111428	0.0732994	0.0740711	0.0715202	0.0727408
		Mg/(Mg+Fe2)	0.970348	0.927859	0.969942	1	0.750423	1	0.788201	0.784937	0.75536		Mg/(Mg+Fe2)	0.739896	0.729306	0.692074	0.733118	0.727937	0.777835	0.764794	0.733356	0.699974	0.683014	0.82433	0.721807	0.722444

## Sheet: SI 8 Magnetite
	EMPA and structural formual of magnetite in diorite of GKZ prospect															EMPA and structural formual of magnetite in Dokhan volcanics of SGUM prospect									EMPA and structural formual of Magnetite in quartz-feldspar porphyry of diorite of GKZ prospect
	Spot No.	6	7	8	22	23	24	7	8	11	13	14	15	16		Spot No.	15	17	23	26	28	31	33		spot No.	48	49	59	62	70	72	73	75	137	138	139
	SiO2	0.023	0.09	0.056	0.387	0.087	0.032	0.119	0.022	0.105	0.061	0.005	0.035	0.04		SiO2	0.306	0.529	0.681	0.873	1.18	0.044	0.057		SiO2	0.013	0.032	0.023	0.023	0.016	0.072	0.049	0.044	0.025	0.035	0.036
	TiO2	0.499	0.314	0.409	0.315	0.291	0.257	0.399	0.468	0.24	0.519	0.429	0.424	0.384		TiO2	0.236	0.541	0.04	0	0	0.016	0.086		TiO2	0.093	0.104	0.222	0.041	0.055	0.069	0.323	0.093	0.152	0.054	0.17
	Al2O3	0.534	0.407	0.441	0.129	0.098	0.061	0.29	0.769	0.279	0.364	0.352	0.211	0.17		Al2O3	0.105	0.202	0.2	0.093	0.155	0.024	0.015		Al2O3	0.059	0.108	0.043	0.095	0.051	0.078	0.129	0.084	0.133	0.063	0.119
	Cr2O3	0.38	0.396	0.424	0.169	0.558	0.16	0.094	0.34	0.39	0.411	0.427	0.446	0.406		Cr2O3	0.09	0.02	0.028	0.016	0.025	0.029	0.033		Cr2O3	0.544	0.399	0.466	0.444	0.569	0.539	0.55	0.543	0.538	0.531	0.455
	FeO	95.381	95.664	97.552	95.502	96.64	96.283	96.292	95.456	96.616	95.608	96.066	95.959	96.376		FeO	81.116	79.982	79.813	79.986	79.092	79.997	79.677		FeOt	78.645	78.596	79.038	81.379	79.109	79.519	79.481	78.68	77.754	77.566	77.823
	MnO	0.022	0.034	0.044	0.003	0.081	0.027	0.022	0.021	0.017	0.042	0.035	0.021	0.021		MnO	0.011	0.05	0.002	0.038	0	0.042	0.015		MnO	0	0.084	0.002	0.022	0.047	0.031	0	0	0	0	0
	MgO	0.053	0.016	0.062	0.092	0.015	0.054	0.077	0	0.05	0.037	0.088	0.081	0.03		MgO	0.014	0.124	0.147	0.118	0.197	0.013	0		MgO	0.007	0.007	0	0.011	0	0.002	0.005	0.012	0.012	0	0.012
	CaO	0	0	0	0.212	0.041	0.018	0.029	0.002	0.011	0	0.017	0	0.007		CaO	0.079	0.226	0.029	0.068	0.098	0.02	0.048		CaO	0.025	0.007	0.051	0.017	0.193	0.015	0.058	0.021	0.045	0.01	0.031
	Na2O	0.018	0.037	0	0	0	0.041	0	0.023	0.02	0	0	0	0		Na2O	0	0	0	0	0.047	0.011	0.045		Na2O	0.028	0	0	0.068	0	0	0	0.009	0.017	0	0
	K2O	0	0	0	0	0	0	0	0	0	0	0	0	0		K2O	0.047	0.032	0.08	0.048	0.07	0.017	0.001		K2O	0	0	0	0	0	0	0	0	0	0	0
	Total	96.977	96.983	98.991	96.827	97.84	96.976	97.374	97.126	97.728	97.042	97.426	97.198	97.501		Total	82.067	81.769	81.072	81.289	80.919	80.22	80.037		Total	79.497	79.368	79.887	82.1	80.339	80.374	80.614	79.5	78.722	78.285	78.671
	Structural formula based on 4 oxygen atoms															Structural formula based on 4 oxygen atoms									Structural formula based on 4 oxygen atoms
	Si	0.000849473	0.0033247	0.00202575	0.0143074	0.00318998	0.00118356	0.00437876	0.000810643	0.00384902	0.00225219	0.000183823	0.00129079	0.00147166		Si	0.0133714	0.0300407	0.0231461	0.038406	0.0520632	0.00196715	0.00255615		Si	0.000587244	0.00144638	0.00103346	0.00100469	0.000716699	0.00321477	0.00218038	0.00198525	0.00113936	0.00160428	0.00164136
	Ti	0.0138651	0.00872651	0.0111307	0.00876114	0.00802716	0.00715109	0.0110453	0.0129734	0.00661869	0.0144159	0.0118655	0.011764	0.0106287		Ti	0.00775832	0.00132747	0.0178082	0	0	0.000538152	0.00290141		Ti	0.00316052	0.00353643	0.00750447	0.00134738	0.00185344	0.00231775	0.0108128	0.0031568	0.00521152	0.00186212	0.00583108
	Al	0.0232444	0.0177199	0.0188015	0.00562077	0.00423497	0.00265904	0.0125765	0.0333956	0.0120537	0.0158392	0.015252	0.0091712	0.00737146		Al	0.00540755	0.010398	0.0104167	0.00482196	0.00806002	0.0012646	0.000792789		Al	0.00314111	0.00575321	0.00227715	0.00489085	0.00269242	0.00410457	0.00676522	0.00446682	0.00714378	0.00340337	0.00639445
	Fe+3	1.93542	1.94578	1.94276	1.94328	1.95715	1.97495	1.95384	1.92872	1.95535	1.93883	1.94824	1.95171	1.95613		Fe+3	1.94857	1.92476	1.90654	1.91714	1.88495	1.99222	1.98613		Fe+3	1.96932	1.97002	1.96409	1.97363	1.97202	1.9658	1.9479	1.96568	1.96039	1.97042	1.96226
	Fe+2	1.0107	1.00969	1.00846	1.0095	1.00627	1.00327	1.00937	1.01284	1.0066	1.01332	1.00547	1.00795	1.00928		Fe+2	1.01578	1.01969	1.02019	1.02571	1.03348	0.99885	1.00209		Fe+2	1.00176	1.00096	1.00601	0.999306	0.991524	1.00351	1.0099	1.00322	1.00315	1.00298	1.00514
	Mn	0.000688224	0.00106384	0.00134814	9.39413e-05	0.00251559	0.00084584	0.000685666	0.000655408	0.000527831	0.00131344	0.00108989	0.000655983	0.000654416		Mn	0.00040713	7.47272e-05	0.00185301	0.00141597	0	0.00159045	0.000569754		Mn	0	0.00321585	7.61171e-05	0.000813979	0.0017832	0.00117237	0	0	0	0	0
	Mg	0.00291814	0.000881128	0.00334348	0.00507045	0.000819915	0.00297743	0.0042238	0	0.00273237	0.00203651	0.00482304	0.0044533	0.00164543		Mg	0.000911994	0.00966695	0.00808822	0.00773884	0.0129576	0.000866436	0		Mg	0.000471392	0.000471669	0	0.000716319	0	0.000133124	0.000331677	0.000807148	0.000815287	0	0.000815624
	Ca	0	0	0	0.00839767	0.00161074	0.000713321	0.00114334	7.89606e-05	0.000432042	0	0.000669655	0	0.000275943		Ca	0.00369875	0.00137068	0.0105951	0.00320529	0.00463284	0.000958049	0.00230635		Ca	0.00121001	0.000339002	0.00245533	0.00079566	0.00926291	0.000717598	0.00276527	0.00101521	0.00219739	0.000491119	0.00151438
	Na	0.00128896	0.00265008	0	0	0	0.00294015	0	0.00164317	0.00142147	0	0	0	0		Na	0	0	0	0	0.00402062	0.000953508	0.00391264		Na	0.00245234	0	0	0.00575919	0	0	0	0.000787323	0.00150216	0	0
	K	0	0	0	0	0	0	0	0	0	0	0	0	0		K	0.00262006	0.00450207	0.0017862	0.00269392	0.00394008	0.000969599	5.72097e-05		K	0	0	0	0	0	0	0	0	0	0	0
	Cr	0.0110963	0.0115659	0.0121266	0.00493982	0.0161763	0.0046788	0.00273468	0.00990515	0.0113032	0.0119975	0.0124117	0.0130046	0.01181		Cr	0.00310937	0.000976554	0.000691874	0.000556519	0.000872094	0.00102508	0.00117004		Cr	0.0194289	0.0142587	0.0165549	0.0153343	0.0201513	0.0190274	0.0193497	0.0193704	0.0193855	0.0192434	0.0164016

## Sheet: SI 9 ilmenite
	EMPA and structural formual of ilmenite in diorite of GKZ prospect
	Spot No.	9	10	12	17	18	19	20	21
	SiO2	0.044	0.015	0.04	0	0	0	0.033	0
	TiO2	40.616	43.018	43.692	46.434	41.781	42.61	42.84	42.252
	Al2O3	0.031	0.035	0.081	0.04	0.043	0.022	0.009	0.036
	Fe2O3	53.08	51.833	52.791	48.71	52.54	52.494	52.679	53.357
	MnO	0.381	3.053	3.57	0.096	0.264	2.92	2.868	2.749
	MgO	0	0.064	0.109	0	0.032	0.053	0.045	0.044
	CaO	0.015	0.046	0.016	0.012	0.009	0.004	0	0.003
	Na2O	0	0.025	0	0.079	0.019	0	0	0
	K2O	0.007	0	0	0.002	0	0	0	0
	Cr2O3	0.326	0.066	0.094	0.106	0.051	0.052	0.016	0.045
	BaO	0.445	0.545	0.482	0.512	0.548	0.521	0.411	0.513
	Total	94.947	98.795	100.923	96.053	95.291	98.679	98.901	98.999
	Structural formula based on 3 oxygen atoms
	Si	0.00123429	0.00040341	0.00105076	0	0	0	0.000885536	0
	Ti	0.857159	0.870373	0.863464	0.970374	0.879264	0.862668	0.864852	0.852785
	Al	0.0010249	0.00110938	0.00250774	0.00130954	0.00141764	0.000697767	0.000284636	0.00113828
	Fe+3	0.271614	0.25167	0.263203	0.0504562	0.234578	0.269197	0.265019	0.288742
	Fe+2	0.84889	0.79734	0.780364	0.967759	0.871405	0.793869	0.798751	0.788472
	Mn	0.00905262	0.0695452	0.079432	0.00225871	0.00625503	0.066558	0.0651864	0.0624672
	Mg	0	0.00256592	0.00426852	0	0.00133444	0.00212626	0.00180017	0.00175976
	Ca	0.000450846	0.00132552	0.000450335	0.000357156	0.000269747	0.000115336	0	8.62356e-05
	Na	0	0.00130359	0	0.00425478	0.00103048	0	0	0
	K	0.000250507	0	0	7.08748e-05	0	0	0	0
	Cr	0.0072303	0.00140338	0.00195229	0.002328	0.00112794	0.0011064	0.000339459	0.000954508
	Ba	0.00489179	0.00574375	0.00496173	0.00557336	0.0060071	0.00549432	0.00432193	0.00539329
