# Supplementary material
Source: MDPI journal article supplement (https://www.mdpi.com/2076-3263/13/9/283)
Supplement: s1 [file s1 › SII 1-4.xlsx]

## Sheet: SII 1 Iron oxides
	EDX analyses of iron oxide minerals
	Mineral	Specularite and magnetite					Mineral	Hydrated specularite
	Oxides	Dc2-6	Dc2-11	Ma6-1	U13-2		Oxides	Db7-5	Db7-7	Db7-9	Db7-10
	SiO2	9.1	10.7	1.1	6.7		SiO2	13.9	15.6	3.8	4
	AL2O3				2.9		FeOt	86.1	83.7	96.2	96
	FeOt	90.9	89.3	97.9	90.4		SO3--		0.7
	SO3--			0.9
	Figure 1. EDX backscatter image showing specularite mineral							Figure 2. EDX backscatter image showing intergrowth barite and radiating specular hematite

## Sheet: SII 2 Copper minerals
	EDX analyses of some copper minerals
	Mineral	Chalcopyrite					Mineral	Altered chalcopyrite					Mineral	Alteration products								Mineral	Copper silicate
	Element	Dc2-4	Dc-12	Dc-16	Dc2-4		Element	Da2-2	Da2-3	Da2-4	Da2-5		Element	Dc2-2	Dc2-3	Dc2-9	Dc2-10	Dc2-13	Dc2-14	Dc2-15		Oxides	U13	U13-1
	Si	1.6	4.7	5.8	1.6		Si	8.8	4.2	4.6	5.7		Si	8	7.6	39.2	18.6	10.9	12.8	3.8		Sio2	40.4	40.2
	S	32.7	32.4	24.5	32.7		Al	0.8					S	2	3.7			1.6	0.6	31.7		FeO		1.3
	Fe	29.6	30.9	35.7	29.6		S	3.6	25	26.3	4.1		Cl	0.7	3.5				0.4			Al2o3	5.8	6.3
	Cu	32.8	32.1	34	32.8		Ca	0.8			0.7		Fe	60.3	49.1	21.4	66.1	56	63.1	31.4		CaO	2.5	2.9
	C	3.3			3.3		Fe	80.3	58.8	59	88.7		Cu	25.9	34.5	38.1	14.6	25.1	21.3	33.1		CuO	49.6	47.6
							Cu	5.7					As	0.7	1.6			5.5	1.4			Cl	0.8	0.3
							K		12.1	10.1	0.8		Mg	1.2								K	0.9	1.4
													Al	1.2
													Ca			1.3	0.8	0.8	0.5
		Figure 3. EDX backscatter image showing oxidized pyrite and veinlets of pyrite in quartz vein											Figure 4. EDX backscatter image showing partial alteration of chalcopyrite by colloform goethite										Figure 5. EDX backscatter image showing copper veinlets and barite streaks in alteraion zones at SGUM

## Sheet: SII 3 Barite
		EDX analyses of barite
		Mineral	Barite
		Oxides	DB7-3	DB7-4	DB7-6	DB7-7	Da2-1
		SiO2	11.2	11.7	12.9	4	12.9
		FeOt	4.5	4.5	2.2	2.7	2.2
		BaO	66.4	65.8	66.9	73.2	66.9
		SO3	17.9	18	17.9	20.2	17.9
		Figure 6. EDX backscatter image showing barite mineral							Figure 7. EDX backscatter image showing barite veinlet

## Sheet: SII 4 Miscellaneous minerals
	EDX analyses of some accessory minerals
	Mineral	Monazite				Mineral	Amphibole			Mineral	Apatite			Mineral	Thorite		Mineral	Electrum gold
	Oxides	DC-5	Db7-1	Da2-12		Oxides	U13-7	U13-9		Oxides	U13-4	U13-10		Oxides	U13-3		Element	Da2-10	Da2-11
	SiO2	16.2	14	7		SiO2	30.7	31.3		SiO2	4.2	3.6		SiO2	23		Ag	24.5	22.2
	Al2O3	0.9				Al2O3	17.1	17.4		Al2O3	1.6	1.7		Al2O3	5.4		Au	74.5	76.8
	FeOt	2.5		3.9		FeOt	27.3	23.8		FeOt	4.1	3.2		P2O5	5.1
	P2O5	19.6	20.8	22.8		MgO	17.9	18.6		CaO	62.2	60		ThO2	66.4
	CaO	1.2		0.8		CaO	0.5	1.1		MgO		2.6
	La2O3	13	17.9	16.7		K2O	1.9	2.5		P2O5	27.9	26.6
	Ce2O3	26.4	32.5	32.9		P2O5		0.4		Cu		3.2
	Pr2O3	4.1	4.6	4.3		TiO2	2	2.5
	Nd2O3	12.8	10.2	10		CuO	2.5	2.3
	Sm2O3	3.1		1.7
	ThO2	0.2
	Figure 7. EDX backscatter image of monazite (Mnz) in alteration zone							Figure 8. EDX backscatter image of anhderal gold (Au) In quartz vein
