# Supplementary material
Source: MDPI journal article supplement (https://www.mdpi.com/2076-3263/13/9/283)
Supplement: s1 [file s1 › SIII.xlsx]

## Sheet: Fire assay
	Gold content determined by fire assay technique
	Prospect*	Rock type	Au (g/t)
	SGUM	Monzogranite	0.72
		Dacite	0.72
			1.1
		Quartz vein	0.48
		Alteration zones	ND
			0.15
			0.15
			0.58
	GKZ	Diorite	0.72
		Granodiorite	0.62
		Quartz veins	1.1
			0.15
		Alteration zones	0.55
			0.52
			0.36
			1.3
			0.42
			0.76
			1.86
			3.3
			0.15
	* South Gabal Um Monqul (SGUM)
	*Gabal Al Kharaza (GKZ)
